# Supplementary material for: Zwerg und Titan: Zur Deutung eines Erzähltextes von Rosa Montero als Parabel
Source: MDPI journal article supplement (doi:10.3390/ijms23010085), 1996-01-01
Supplement: s1 [file s1]

Addition of Trans resveratrol loaded highly concentrate double emulsion to yoghurts: effect on physicochemical properties

Rocío DÍAZ-RUIZ <sup>a,b</sup> (uo219049@uniovi.es), Manuel Ramón FERNÁNDEZ <sup>a</sup> (UO245369@uniovi.es), Amanda LACA<sup>a</sup> (lacaamanda@uniovi.es), Marta Sánchez<sup>a</sup> (UO209096@uniovi.es), María MATOS <sup>a,b</sup> (matosmaria@uniovi.es), Gemma GUTIÉRREZ <sup>a,b,1</sup>(gutierrezgemma@uniovi.es)

<sup>a</sup> Department of Chemical and Environmental Engineering, University of Oviedo, Julián Clavería 8, 33006 Oviedo, Spain.

<sup>b</sup> Instituto Universitario de Biotecnología de Asturias, University of Oviedo, 33006, Spain

Corresponding autor: Gemma Gutiérrez; Tel.: +34 985103509; Fax: +34 985103434

---

---

<sup>1</sup>Corresponding author email: gutierrezgemma@uniovi.es

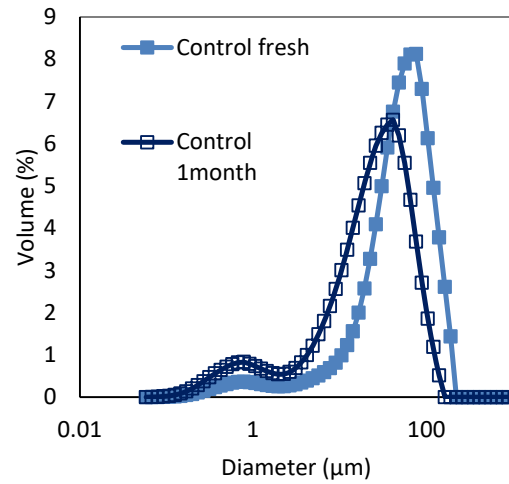

A

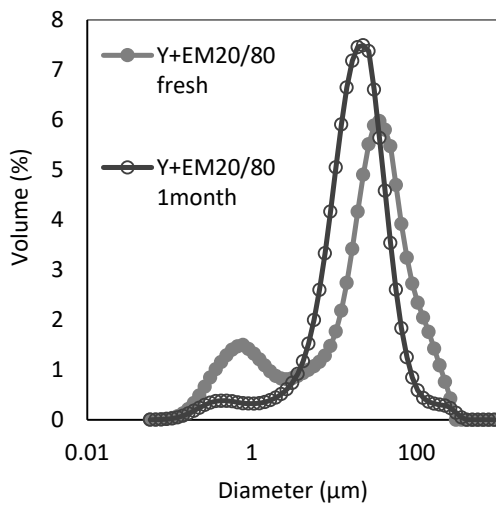

B

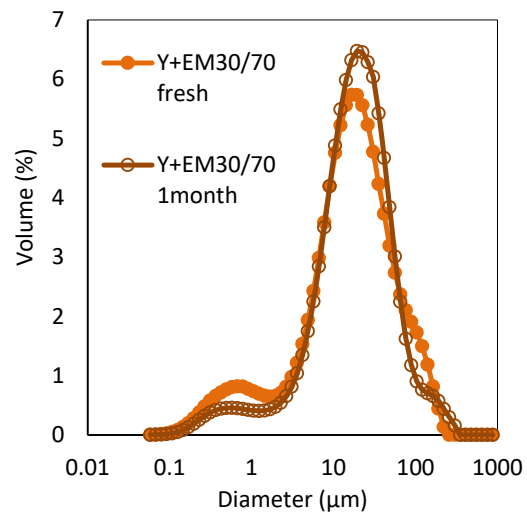

C

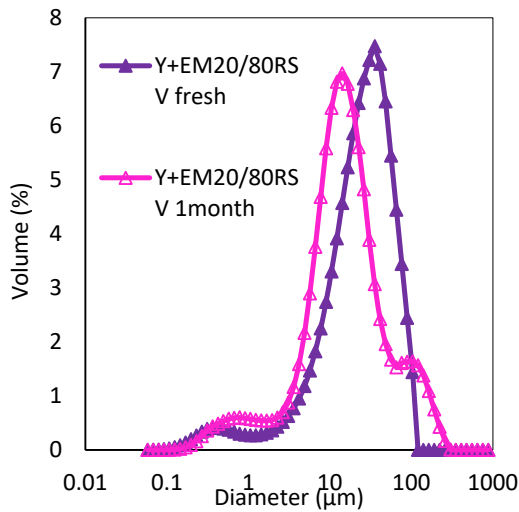

D

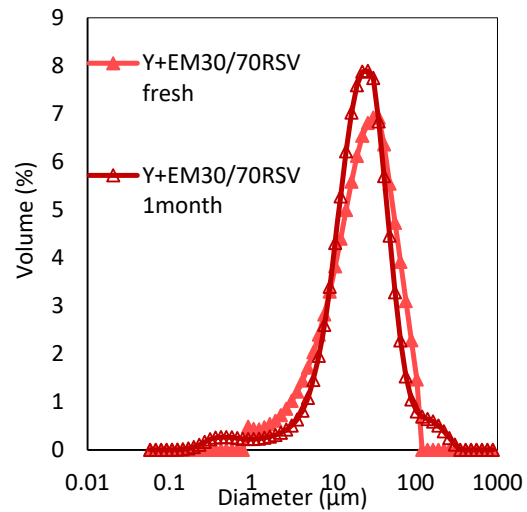

E

Figure S1. Droplet size distribution of the different elaborated yoghurts, comparing each fresh yoghurt with its monthly counterpart.

Table S1. Mean diameters,  $D(v,0.5)$  and  $D_{[4,3]}$ , of the different samples prepared: control yoghurt and yoghurts with addition of double emulsions (EM20/80 and EM30/70) without and with RSV

| Type of yoghurt | Fresh      |             | After storing 1 month at 4°C |             |
|-----------------|------------|-------------|------------------------------|-------------|
|                 | $D(v,0.5)$ | $D_{[4,3]}$ | $D(v,0.5)$                   | $D_{[4,3]}$ |
| Control         | 48.57      | 56.06       | 23.43                        | 29.73       |
| Y+EM20/80       | 24.53      | 36.21       | 17.25                        | 24.27       |
| Y+EM30/70       | 15.85      | 26.06       | 17.27                        | 26.79       |
| Y+EM20/80 RSV   | 23.74      | 28.49       | 20.16                        | 27.25       |
| Y+EM30/70 RSV   | 21.50      | 26.98       | 21.92                        | 27.15       |

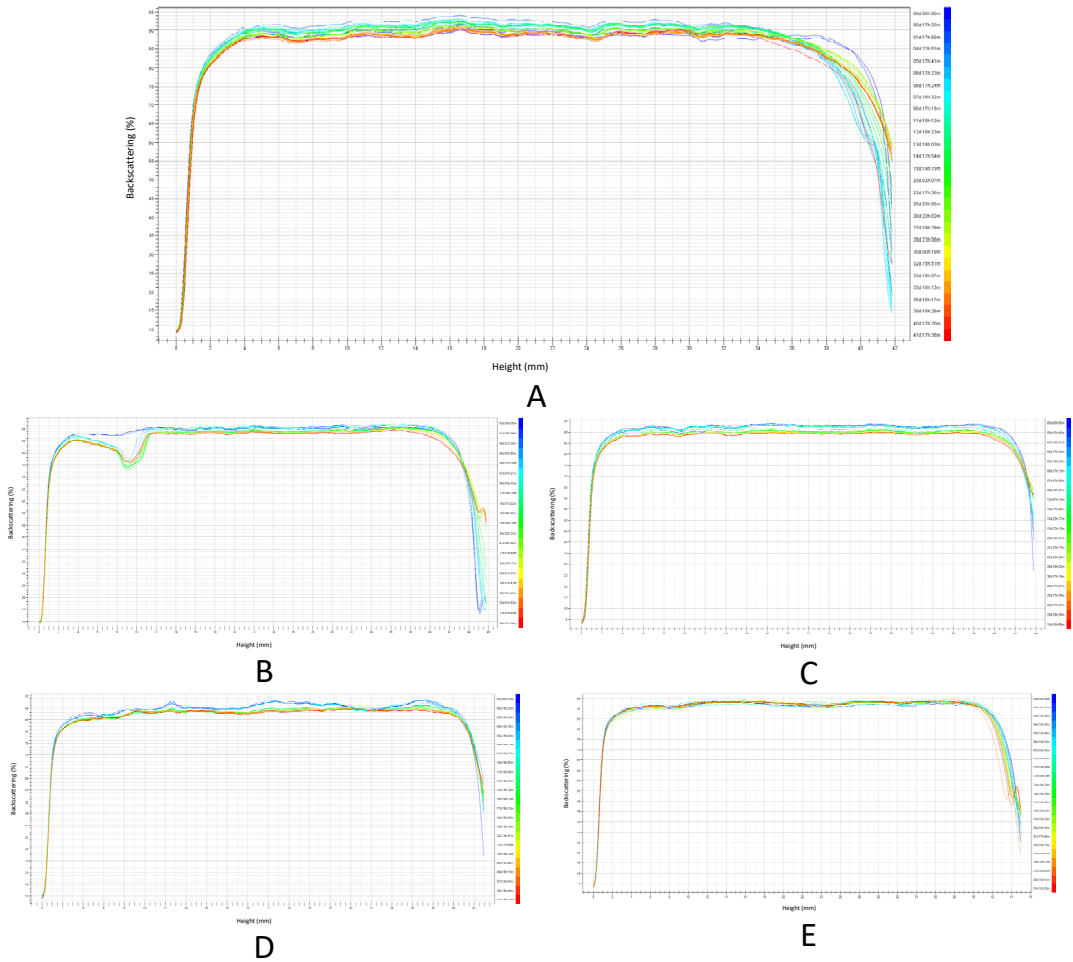

Figure S2. Backscattering profiles of the different processed types of yoghurt: Control yoghurt (A); Yoghurt with emulsion without RSV 20:80 (B); Yoghurt with emulsion without RSV 30:70 (C); Yoghurt with emulsion with RSV 20:80 (D); Yoghurt with emulsion with RSV 30:70 (E)

Table S2. Results of the adjustment to the Herschel-Bulkley model of fresh and stored yoghurts for 1 month.

|                            |              | $\tau_0$ (Pa) | $K$ (Pa s <sup>n</sup> ) | $n$ (-)        | $r^2$         |
|----------------------------|--------------|---------------|--------------------------|----------------|---------------|
| Fresh                      | Control      | -19.7 ± 0.01  | 58.5 ± 0.73              | 0.12 ± 0.001   | 0.95 ± 0.0005 |
|                            | Y+EM20/80    | -0.76 ± 2.9   | 20.5 ± 3.9               | 0.32 ± 0.04    | 0.98 ± 0.004  |
|                            | Y+EM30/70    | -4.68 ± 1.08  | 29.8 ± 3.63              | 0.25 ± 0.03    | 0.97 ± 0.01   |
|                            | Y+EM20/80RSV | -1632 ± 158   | 1681 ± 161               | 0.002 ± 0.0004 | 0.57 ± 0.16   |
|                            | Y+EM30/70RSV | -1595 ± 734   | 1647 ± 739               | 0.003 ± 0.0013 | 0.561 ± 0.13  |
| After one month of storage | Control      | -58.4 ± 7.33  | 101.5 ± 1.1              | 0.075 ± 0.007  | 0.934 ± 0.02  |
|                            | Y+EM20/80    | -1441 ± 525   | 1499 ± 526               | 0.004 ± 0.001  | 0.86 ± 0.004  |
|                            | Y+EM30/70    | -6.29 ± 4.7   | 34.7 ± 10.8              | 0.21 ± 0.055   | 0.97 ± 0.02   |
|                            | Y+EM20/80RSV | -1539 ± 366   | 1584 ± 374               | 0.003 ± 0.0003 | 0.795 ± 0.08  |
|                            | Y+EM30/70RSV | -2131 ± 64    | 2181 ± 62                | 0.002 ± 0      | 0.63 ± 0.045  |

Table S3. Thixotropy values of yogurts at time zero (fresh) and after 1 month stored in a fridge.

| Thixotropy (Pa/s) |              |                      |
|-------------------|--------------|----------------------|
| Type of yoghurts  | Fresh        | After 1 month stored |
| Control           | 1746 ± 0     | 1835 ± 136           |
| Y+EM20/80         | 1293 ± 0     | 2176 ± 6.4           |
| Y+EM30/70         | 1443 ± 139   | 1606 ± 298           |
| Y+EM20/80RSV      | 1847 ± 187   | 1571 ± 344           |
| Y+EM30/70RSV      | 1915.5 ± 200 | 1735 ± 65            |

*Table S4. Results obtained after the colorimetric analysis of yogurts at time zero (fresh) and after 1 month stored in a fridge*

| Type of yoghurts |              |              |             |              |              |
|------------------|--------------|--------------|-------------|--------------|--------------|
| Fresh            |              |              |             |              |              |
|                  | Control      | Y+EM20/80    | Y+EM30/70   | Y+EM20/80RSV | Y+EM30/70RSV |
| <b>L*</b>        | 84.9 ± 0.9   | 85.0 ± 0.25  | 84.4 ± 0.97 | 84.5 ± 0.21  | 84.7 ± 0.7   |
| <b>a*</b>        | 0.20 ± 0.1   | 0.23 ± 0.06  | 0.28 ± 0.18 | 0.35 ± 0.07  | 0.2 ± 0.28   |
| <b>b*</b>        | 4.77 ± 0.4   | 4.87 ± 0.15  | 4.87 ± 0.15 | 4.85 ± 0.21  | 4.95 ± 0.07  |
| Month            |              |              |             |              |              |
| <b>L*</b>        | 84.95 ± 0.07 | 84.95 ± 0.21 | 84.8 ± 0.66 | 85.7 ± 0.1   | 85 ± 1.27    |
| <b>a*</b>        | 0.25 ± 0.07  | 0.15 ± 0.21  | 0.28 ± 0.10 | 0.40 ± 0.14  | 0.3 ± 0.00   |
| <b>b*</b>        | 4.7 ± 0.14   | 4.60 ± 0.28  | 4.73 ± 0.10 | 4.80 ± 0.07  | 4.80 ± 0.14  |
